# Supplementary material for: Seasonal drought surpasses the effects of irrigation regime in the microbial dynamics of grapevine rhizosphere and presents high impact in mycobiome
Source: Research Square preprint supplement (doi:10.21203/rs.3.rs-7800383/v1), 2025-11-17
Supplement: Supplementary file 1 [file 43abde6687abc6fc504c1b59.docx]

Additional File 2 – Tables descriptions are on top of the respective table.

**Table S I**. Statistical comparison of the relative content of metallic oxides present in the soils based on One-Way ANOVA comparing the irrigation strategy adopted at the vineyard for each sampling year. Numbers in bold represent significant p values (p < 0.05). NI – No Irrigation (corresponding to Rainfed irrigation), DI – Deficit Irrigation, FI – Full Irrigation.

|  | **2022** | | | **2023** | | |
| --- | --- | --- | --- | --- | --- | --- |
|  | NI *vs* DI | NI *vs* FI | DI *vs* FI | NI *vs* DI | NI *vs* FI | DI *vs* FI |
| **Na2O** | 0.735 | **1.45E-4** | **1.94E-4** | 0.301 | **0.006** | **0.003** |
| **K2O** | 0.090 | **3.98E-4** | **0.004** | 0.390 | **0.039** | 0.062 |
| **P2O5** | 0.264 | **0.004** | **1.25E-5** | 0.264 | **0.004** | **1.25E-5** |
| **MgO** | **0.030** | **0.001** | **0.005** | 0.369 | 0.145 | 0.234 |
| **CaO** | **0.010** | **0.004** | 0.078 | 0.074 | 0.227 | 0.670 |

**Table S II**. Statistical comparison of α-diversity metrics based on Kruskal-Wallis test among sampling year, sample type, and year-specific irrigation strategy- Numbers in bold represent significant p values (p < 0.05). NI – No Irrigation (corresponding to Rainfed irrigation), DI – Deficit Irrigation, FI – Full Irrigation.

|  |  | | Observed Richness | | Shannon Index | |
| --- | --- | --- | --- | --- | --- | --- |
|  |  | | Prokaryotes | Fungi | Prokaryotes | Fungi |
| Sampling Year | | | **3.06E-6** | **2.98E-6** | **3.07E-6** | **1.13E-3** |
| Type | | | **3.62E-4** | **3.17E-4** | **3.76E-4** | **1.55E-2** |
| Irrigation Strategy | **2022** | NI *vs* DI | 0.675 | **0.047** | 0.251 | 0.175 |
| NI *vs* FI | 0.251 | **0.016** | 0.347 | 0.076 |
| DI *vs* FI | 0.465 | 0.917 | 0.465 | 0.917 |
| **2023** | NI *vs* DI | 0.754 | 0.175 | 0.917 | 0.465 |
| NI *vs* FI | 0.834 | 0.251 | 0.602 | 0.602 |
| DI *vs* FI | 0.754 | 0.601 | 0.602 | 0.117 |

**Table S III.** PERMANOVA statistical comparison of β-diversity calculated with the Bray-Curtis Dissimilarity Index for the sampling year, sample type, and year-specific irrigation strategy. Numbers in bold represent significant p values (p < 0.05).

|  |  | PERMANOVA | | R2 | |
| --- | --- | --- | --- | --- | --- |
|  |  | Prokaryotes | Fungi | Prokaryotes | Fungi |
| Sampling Year | | **0.001** | **0.001** | 0.101 | 0.088 |
| Type | | **0.001** | **0.001** | 0.246 | 0.268 |
| Irrigation Strategy | 2022 | **0.001** | **0.001** | 0.135 | 0.167 |
| 2023 | 0.080 | **0.021** | 0.119 | 0.144 |

**Table S IV.** Enriched prokaryotic genera and fungal species between the soils submitted to No Irrigation or Full Irrigation as provided by the ANCOM-BC calculations for each year of sampling. NI: No Irrigation, FI: Full Irrigation.

| **2023** | **Standard Error** | 0.558 | 0.682 | 0.702 | 0.232 |  |  |  |  |  |  | 0.715 | 0.892 | 0.708 | 0.679 | 0.231 | 0.162 | 0.145 |  |  |  |  |
| --- | --- | --- | --- | --- | --- | --- | --- | --- | --- | --- | --- | --- | --- | --- | --- | --- | --- | --- | --- | --- | --- | --- |
| ***q*-value** | 7.00E-6 | 3.02E-3 | 6.08E-3 | 1.13E-3 |  |  |  |  |  |  | 2.00E-4 | 2.15E-2 | 2.32E-4 | 5.42E-3 | 8.24E-3 | 5.34E-2 | 3.66E-102 |  |  |  |  |
| ***p*-value** | 1.58E-8 | 6.50E-6 | 1.31E-5 | 2.44E-6 |  |  |  |  |  |  | 6.21E-7 | 6.78E-5 | 7.23E-8 | 1.69E-5 | 2.58E-5 | 1.70E-4 | 1.13E-104 |  |  |  |  |
| **LFC** | -3.15 | -3.07 | -3.06 | -1.09 |  |  |  |  |  |  | 3.57 | 3.55 | 3.51 | 2.92 | 0.97 | 0.61 | -3.15 |  |  |  |  |
| **Enriched** | FI | FI | FI | FI |  |  |  |  |  |  | NI | NI | NI | NI | NI | NI | FI |  |  |  |  |
| **Name** | g_P52-10 | g_Palsa-1150 | o_UBA9160 | g_SCUD01 |  |  |  |  |  |  | s*_Vishniacozyma globispora* | s*_Ascotricha erinacea* | s*_Filobasidium oeirense* | s*_Pseudocyclothyriella clematidis* | s*_Clonostachys rosea* | s*_Dactylonectria macrodidyma* | s_*Bovista plumbea* |  |  |  |  |
| **2022** | **Standard Error** | 0.742 | 0.687 | 0.692 | 0.512 | 0.698 | 0.141 | 0.144 | 0.680 | 0.716 | 0.179 | 0.117 | 0.497 | 0.694 | 0.572 | 0.576 | 0.274 | 1.059 | 0.318 | 0.813 | 0.549 | 0.105 |
| ***q*-value** | 1.16E-3 | 1.06E-3 | 2.77E-3 | 2.14E-5 | 3.38E-2 | 8.19E-205 | 2.06E-168 | 1.07E-4 | 2.34E-3 | 3.08E-2 | 0 | 1.36E-12 | 7.84E-5 | 6.45E-9 | 4.15E-3 | 7.80E-67 | 2.49E-2 | 5.38E-28 | 4.44E-3 | 5.64E-6 | 1.54E-3 |
| ***p*-value** | 3.65E-6 | 3.34E-6 | 8.81E-6 | 6.69E-8 | 1.08E-4 | 2.54E-207 | 6.39E-171 | 3.36E-7 | 7.40E-6 | 9.85E-5 | 0 | 4.87E-15 | 2.84E-7 | 2.33E-8 | 1.51E-5 | 2.78E-69 | 9.21E-5 | 1.92E-30 | 1.63E-5 | 2.03E-8 | 5.61E-6 |
| **LFC** | 3.44 | 3.19 | 3.08 | 2.76 | 2.70 | -4.33 | -4.00 | -3.47 | -3.21 | -0.70 | 4.70 | 3.89 | 3.56 | 3.20 | 2.49 | -4.82 | -4.14 | -3.65 | -3.51 | -3.08 | -0.48 |
| **Enriched** | NI | NI | NI | NI | NI | FI | FI | FI | FI | FI | ÑI | NI | NI | NI | NI | FI | FI | FI | FI | FI | FI |
| **Name** | g_*Actinoallomurus* | g_FEB-22 | g_*Rhizorhabdus* | g_WS-7 | g*_Noviherbaspirillum* | g_SCUD01 | g_WYBL01 | g_UG | g_Nitrospira | g_UBA12294 | s*_Penicillium canescens* | s*_Phialophora* sp. | s_*Penicillago nodositata* | f_*Phaeosphaeriaceae* | s_*Entomortierella* sp. | s*_Mortierella* sp. | s*_Gongronella brasiliensis* | f_*Herpotrichiellaceae* | s*_Mortierella capitata* | s*_Fimicolochytrium* sp. | s_*Stachybotrys terrestris* |
|  |  | **Prokaryotic Genera** | | | | | | | | | | **Fungal Species** | | | | | | | | | | |

**Table S V**. Enriched prokaryotic genera and fungal species between non- and fully-irrigated soils resulting from the MaAsLin2 calculations covariating for the sampling year. Names in bold denote taxa that didn't require an adjustment for its statistical significance.

|  | | Name | Log2FC | *p*-value | *q*-value | St. Error |
| --- | --- | --- | --- | --- | --- | --- |
| Prokaryotic Genera | **SCUD01** | | 2.72 | 1.96E-5 | 5.15E-3 | 0.523 |
| **PALSA_1355** | | 1.43 | 1.4E-4 | 1.64E-2 | 0.321 |
| ***Noviherbaspirillum*** | | -1.61 | 2.23E-4 | 2.18E-2 | 0.377 |
| *Bacillus* | | 0.952 | 2.5E-4 | 2.26E-2 | 0.225 |
| *Rhizorhabdus* | | -1.09 | 5.05E-4 | 3.29E-2 | 0.275 |
| VAYN01 | | -2.12 | 5.0E-4 | 3.29E-2 | 0.534 |
| WYBL01 | | 1.69 | 8.47E-4 | 4.32E-2 | 0.449 |
| QUBU01 | | 1.22 | 1.17E-3 | 4.88E-2 | 0.335 |
| Fungal Species | ***Mortierella* sp.** | | 2.8 | 2.9E-6 | 1.34E-3 | 0.472 |
| ***Penicillium canescens*** | | -2.21 | 7.34E-5 | 1.08E-2 | 0.47 |
| *Ascotricha erinacea* | | -2.41 | 4.25E-4 | 2.09E-2 | 0.598 |
| *Penicillago nodositata* | | -2.9 | 3.7E-4 | 2.09E-2 | 0.708 |
| *Talaromyces minioluteus* | | -2.29 | 4.96E-4 | 2.09E-2 | 0.577 |
| *Phaeosphaeriaceae* sp. | | -2.31 | 1.02E-3 | 3.62E-2 | 0.625 |
| *Humicola fuscoatra* | | 1.73 | 1.25E-3 | 3.72E-2 | 0.477 |
